# Supplementary material for: Radiation fosters dose-dependent and chemotherapy-induced immunogenic cell death
Source: PubMed Central journal article supplement — Oncoimmunology. 2014 Apr 25;3:e28518. doi: 10.4161/onci.28518 (PMC4106151; doi:10.4161/onci.28518), 2014-04-25
Supplement: onci-3-e28518-s01.pdf [file onci-3-e28518-s01.pdf]

## **Supplemental Material to:**

**Encouse B Golden, Derek Frances, Ilenia Pellicciotta,  
Sandra Demaria, Mary Helen Barcellos-Hoff, and Silvia C  
Formenti**

**Radiation fosters dose-dependent and chemotherapy-  
induced immunogenic cell death**

**Oncolmunology 2014; 3(April)**

**<http://dx.doi.org/10.4161/onci.28518>**

**[http://www.landesbioscience.com/journals/oncoimmunology/  
article/28518/](http://www.landesbioscience.com/journals/oncoimmunology/article/28518/)**

**Supplementary material:**

S1. Open reading frame for membrane targeted firefly luciferase

ATGGCTCAGCGGATGACAACACAGCTGCTGCTCCTTCTAGTGTGGGTGGCTGTAGTAGGGGAGGC  
TCAGACAAGGATTGCAGAACAAAACTAATAAGCGAGGAGGACCTGCTGCAGATGGAAGACGCCA  
AAAACATAAAGAAAGGCCCGCGCCATTCTATCCGCTGGAAGATGGAACCGCTGGAGAGCAACTG  
CATAAGGCTATGAAGAGATACGCCCTGGTTCTGGAACAATTGCTTTTACAGATGCACATATCGA  
GGTGGACATCACTTACGCTGAGTACTTCGAAATGTCCGTTCCGTTGGCAGAAGCTATGAAACGAT  
ATGGGCTGAATACAAATCACAGAATCGTCGTATGCAGTGAAAACCTCTTCAATTCTTTATGCCG  
GTGTTGGGCGCGTTATTTATCGGAGTTGCAGTTGCGCCCGGAACGACATTTATAATGAACGTGA  
ATTGCTCAACAGTATGGGCATTTTCGCAGCCTACCGTGGTGTTCGTTTCCAAAAAGGGGTTGCAAA  
AAATTTTGAACGTGCAAAAAAAGCTCCCAATCATCCAAAAAATTATTATCATGGATTCTAAAACG  
GATTACCAGGGATTTTCAGTCGATGTACACGTTTCGTCACATCTCATCTACCTCCCGGTTTTAATGA  
ATACGATTTTGTGCCAGAGTCCTTCGATAGGGACAAGACAATTGCACTGATCATGAACTCCTCTG  
GATCTACTGGTCTGCCTAAAGGTGTCGCTCTGCCTCATAGAACTGCCTGCGTGAGATTCTCGCATG  
CCAGAGATCCTATTTTTGGCAATCAAATCATTCCGGATACTGCGATTTTAAGTGTTGTTCCATTC  
CATCACGGTTTTTGAATGTTTACTACACTCGGATATTTGATATGTGGATTTTCGAGTCGTCTTAAT  
GTATAGATTTGAAGAAGAGCTGTTTCTGAGGAGCCTTCAGGATTACAAGATTCAAAGTGCCTGC  
TGGTGCCAACCCTATTCTCCTTCTTCGCCAAAAGCACTCTGATTGACAAATACGATTTATCTAATT  
TACACGAAATTGCTTCTGGTGGCGCTCCCCTCTCTAAGGAAGTCGGGGAAGCGGTTGCCAAGAGG  
TTCCATCTGCCAGGTATCAGGCAAGGATATGGGCTCACTGAGACTACATCAGCTATTCTGATTAC  
ACCGAGGGGGATGATAAACCGGGCGCGGTTCGGTAAAGTTGTTCCATTTTTTGAAGCGAAGGTTG  
TGGATCTGGATACCGGGAAAACGCTGGGCGTTAATCAAAGAGGCGAACTGTGTGTGAGAGGTCCT  
ATGATTATGTCCGGTTATGTAAACAATCCGGAAGCGACCAACGCCTTGATTGACAAGGATGGATG  
GCTACATTCTGGAGACATAGCTTACTGGGACGAAGACGAACACTTCTTCATCGTTGACCGCCTGA  
AGTCTCTGATTAAGTACAAAGGCTATCAGGTGGCTCCCGCTGAATTGGAATCCATCTTGCTCCAA

CACCCCAACATCTTCGACGCAGGTGTGCGAGGTCTTCCCGACGATGACGCCGGTGAACCTCCCGCC  
GCCGTTGTTGTTTTGGAGCACGGAAAGACGATGACGGAAAAAGAGATCGTGGATTACGTCGCCAG  
TCAAGTAACAACCGCGAAAAAGTTGCGCGGAGGAGTTGTGTTTGTGGACGAAGTACCGAAAGGTC  
TTACCGGAAAACTCGACGCAAGAAAAATCAGAGAGATCCTCATAAAGGCCAAGAAGGGCGGAAA  
GATCGCCGTGGCTGCAGCCATGAGTGGGGCTGGGCCCTGGGCAGCCTGGCCTTTCCTGCTTAGCCT  
GGCCCTAATGCTGCTGTGGCTGCTCAGCTGA

S2. Open reading frame for *Mus musculus* CRT-HaloTag-KDEL

ATGCTCCTTTCGGTGCCGCTCCTGCTTGGCCTCCTCGGCCTGGCCGCCGACACCCTGCCATCTAT  
TTCAAAGAGCAGTTCTTGGACGGAGATGCCTGGACCAACCGCTGGGTCTGAATCCAAACATAAGTC  
CGATTTTGGCAAATTTGTCCTCAGTTCTGGCAAATTTTACGGGGACCTGGAGAAGGATAAAGGGC  
TGCAGACAAGCCAAGATGCCCGATTTTACGCACTGTCCGCCAAATTCGAACCCTTCAGCAATAAG  
GGCCAGACACTGGTGGTACAGTTCACGGTGAAGCATGAGCAGAATATCGACTGTGGGGGCGGCTA  
CGTGAAGCTGTTTCCGAGTGGCTTGGACCAGAAGGACATGCATGGAGACTCAGAATATAACATCA  
TGTTTGGTCCGGACATCTGCGGTCTGGCACCAAGAAGGTTTCATGTCATCTTTAACTACAAGGGC  
AAGAATGTGCTGATCAACAAGGATATCCGGTGTAAGGATGATGAATTCACACACCTATAACACT  
GATTGTGCGGCCAGACAACACCTATGAGGTGAAAATTGACAACAGCCAGGTGGAGTCAGGCTCCT  
TGGAGGATGATTGGGACTTTCTGCCACCCAAGAAGATAAAGGACCCTGATGCTGCCAAGCCGGAA  
GACTGGGATGAACGAGCCAAGATCGATGACCCACAGATTCGAAGCCTGAGGACTGGGACAAGCC  
AGAGCACATCCCTGACCCTGATGCTAAGAAGCCTGAGGACTGGGATGAAGAGATGGATGGAGAGT  
GGGAACCACCAGTGATTCAAAATCCTGAATACAAGGGCGAGTGGAACCACGTCAAATTGACAAC  
CCAGATTACAAGGGTACCTGGATACACCCAGAAATTGACAACCCTGAATACTCCCCGATGCAAA  
TATCTATGCCTATGATAGTTTTGCTGTACTGGGCCTAGATCTCTGGCAGGTCAAGTCCGGGACAA  
TCTTTGACAATTTCTCATCACCAATGATGAGGCCTATGCAGAGGAGTTTGGCAATGAGACGTGG  
GGTGTACCAAGGCTGCAGAGAAGCAGATGAAGGACAAGCAGGATGAGGAGCAGAGGCTTAAGG

AAGAAGAAGAGGACAAGAAGCGTAAAGAGGAAGAAGAAGCTGAGGATAAAGAGGATGATGATGA  
CAGAGATGAAGATGAGGATGAAGAAGATGAGAAGGAGGAAGATGAGGAAGAATCCCCTGGCCAA  
GCCAAGGATGAGCTGTACCTCGAGTGC GGCCGCTACGCTAGCCTGGAGCCAACCACTGAGGATCT  
GTACTTTCAGAGCGATAACGATGGATCCGAAATCGGTACTGGCTTTCATTTCGACCCCCATTATG  
TGGAAGTCCTGGGGGAGCGCATGCACTACGTCGATGTTGGTCCGCGGATGGCACCCCTGTGCTGT  
TCCTGCACGGTAACCCGACCTCCTCCTACGTGTGGCGCAACATCATCCCGCATGTTGCACCGACCC  
ATCGCTGCATTGCTCCAGACCTGATCGGTATGGGCAAATCCGACAAACCAGACCTGGGTATTTC  
TTCGACGACCACGTCCGCTTCATGGATGCCTTCATCGAAGCCCTGGGTCTGGAAGAGGTCGTCCTG  
GTCATTACGACTGGGGCTCCGCTCTGGGTTTCCACTGGGCCAAGCGCAATCCAGAGCGCGTCAA  
GGTATTGCATTTATGGAGTTCATCCGCCCTATCCCGACCTGGGACGAATGGCCAGAATTTGCCCGC  
GAGACCTTCCAGGCCTTCCGCACCACCGACGTCGGCCGCAAGCTGATCATCGATCAGAACGTTTTT  
ATCGAGGGTACGCTGCCGATGGGTGTCGTCCGCCCGCTGACTGAAGTCGAGATGGACCATTACCG  
CGAGCCGTTCTGAATCCTGTTGACCGGAGCCACTGTGGCGCTTCCCAAACGAGCTGCCAATCGC  
CGGTGAGCCAGCGAACATCGTCGCGCTGGTCGAAGAATACATGGACTGGCTGCACCAGTCCCCTG  
TCCCGAAGCTGCTGTTCTGGGGCACCCAGGCCTTCTGATCCCACCGCCGAAGCCGCTCGCCTGG  
CCAAAAGCCTGCCTAACTGCAAGGCTGTGGACATCGGCCCGGTCTGAATCTGCTGCAAGAAGAC  
AACCCGGACCTGATCGGCAGCGAGATCGCGCGCTGGCTGTCTACTCTGGAGATTTCCGGTAAAGA  
CGAACTGTAA

S3. Open reading frame for *Mus musculus* HMGB1

ATGGGCAAAGGAGATCCTAAGAAGCCGAGAGGCAAAATGTCCTCATATGCATTCTTTGT  
GCAAACCTGCCGGGAGGAGCACAAGAAGAAGCACCCGGATGCTTCTGTCAACTTCTCAGA  
GTTCTCCAAGAAGTGCTCAGAGAGGTGGAAGACCATGTCTGCTAAAGAAAAGGGGAAAT  
TTGAAGATATGGCAAAGGCTGACAAGGCTCGTTATGAAAGAGAAATGAAAACCTACATC  
CCCCCAAAGGGGAGACCAAAAAGAAGTTCAAGGACCCCAATGCACCCAAGAGGCCTCCT

TCGGCCTTCTTCTTGTCTGTTCTGAGTACCGCCCCAAAATCAAAGGCGAGCATCCTGGC  
TTATCCATTGGTGATGTTGCAAAGAACTAGGAGAGATGTGGAACAACACTGCAGCAGA  
TGACAAGCAGCCCTATGAGAAGAAAGCTGCCAAGCTGAAGGAGAAGTATGAGAAGGATA  
TTGCTGCCTACAGAGCTAAAGGAAAACCTGATGCAGCGAAAAAGGGGGTGGTCAAGGCT  
GAAAAGAGCAAGAAAAAGAAGGAAGAGGAAGATGATGAGGAGGATGAAGAGGATGAGG  
AAGAGGAGGAAGAAGAGGAAGACGAAGATGAAGAAGAAGATGATGATGATGAATAA
